# Supplementary material for: The distribution and numbers of cheetah (Acinonyx jubatus) in southern Africa
Source: PeerJ. 2017 Dec 11;5:e4096. doi: 10.7717/peerj.4096 (PMC5729830; doi:10.7717/peerj.4096)
Supplement: Appendix 1 [file peerj-05-4096-s004.xls]

## Sheet: Overview
Using standardized search terminology we used the Google search engine to search various web-based data sources (see the following excel sheets) for crowd-sourced information. We scanned at least the first 100 search results for each query for useful data. We searched the internet in English, German, and Afrikaans. When necessary, we contacted data providers to verify observations or to obtain ad…

## Sheet: Search terminology_Internet
core term	with country term	with first qualifier (ordered alphabetically)	with extra qualifier	Search application
Cheetah				stand-alone
Jagluiperd				stand-alone
Gepard				stand-alone
Acinonyx jubatus				stand-alone
Cheetah, Jagluiperd, Gepard, or Acinonyx jubatus	Botswana, Namibia, South Africa, or Zimbabwe			all possible combinations
Cheetah, Jagluiperd, Gepard, or Acinonyx jubatus		camera trap		all possible combinations
Cheetah, Jagluiperd, Gepard, or Acinonyx jubatus		camera trap	farm or hunting farm	all possible combinations
Cheetah, Jagluiperd, Gepard, or Acinonyx jubatus		chase		all possible combinations
Cheetah, Jagluiperd, Gepard, or Acinonyx jubatus		cub(s)		all possible combinations
Cheetah, Jagluiperd, Gepard, or Acinonyx jubatus		death		all possible combinations
Cheetah, Jagluiperd, Gepard, or Acinonyx jubatus		encounter		all possible combinations
Cheetah, Jagluiperd, Gepard, or Acinonyx jubatus		feeding		all possible combinations
Cheetah, Jagluiperd, Gepard, or Acinonyx jubatus		hunt(ed)		all possible combinations
Cheetah, Jagluiperd, Gepard, or Acinonyx jubatus		kill		all possible combinations
Cheetah, Jagluiperd, Gepard, or Acinonyx jubatus		mortality		all possible combinations
Cheetah, Jagluiperd, Gepard, or Acinonyx jubatus		observation		all possible combinations
Cheetah, Jagluiperd, Gepard, or Acinonyx jubatus		photo		all possible combinations
Cheetah, Jagluiperd, Gepard, or Acinonyx jubatus		prey		all possible combinations
Cheetah, Jagluiperd, Gepard, or Acinonyx jubatus		road accident		all possible combinations
Cheetah, Jagluiperd, Gepard, or Acinonyx jubatus		running		all possible combinations
Cheetah, Jagluiperd, Gepard, or Acinonyx jubatus		(on) safari		all possible combinations
Cheetah, Jagluiperd, Gepard, or Acinonyx jubatus		seen		all possible combinations
Cheetah, Jagluiperd, Gepard, or Acinonyx jubatus		shot		all possible combinations
Cheetah, Jagluiperd, Gepard, or Acinonyx jubatus		sighting		all possible combinations
Cheetah, Jagluiperd, Gepard, or Acinonyx jubatus		spotted		all possible combinations
Cheetah, Jagluiperd, Gepard, or Acinonyx jubatus		stalk(ing)		all possible combinations
Cheetah, Jagluiperd, Gepard, or Acinonyx jubatus		trophy		all possible combinations
Cheetah, Jagluiperd, Gepard, or Acinonyx jubatus		vehicle collision		all possible combinations
Cheetah, Jagluiperd, Gepard, or Acinonyx jubatus		video		all possible combinations
Cheetah, Jagluiperd, Gepard, or Acinonyx jubatus		wildlife camera		all possible combinations
Cheetah, Jagluiperd, Gepard, or Acinonyx jubatus		wildlife camera	farm or hunting farm	all possible combinations
Cheetah, Jagluiperd, Gepard, or Acinonyx jubatus	Botswana, Namibia, South Africa, or Zimbabwe	camera trap		all possible combinations
Cheetah, Jagluiperd, Gepard, or Acinonyx jubatus	Botswana, Namibia, South Africa, or Zimbabwe	camera trap	farm or hunting farm	all possible combinations
Cheetah, Jagluiperd, Gepard, or Acinonyx jubatus	Botswana, Namibia, South Africa, or Zimbabwe	chase		all possible combinations
Cheetah, Jagluiperd, Gepard, or Acinonyx jubatus	Botswana, Namibia, South Africa, or Zimbabwe	cub(s)		all possible combinations
Cheetah, Jagluiperd, Gepard, or Acinonyx jubatus	Botswana, Namibia, South Africa, or Zimbabwe	death		all possible combinations
Cheetah, Jagluiperd, Gepard, or Acinonyx jubatus	Botswana, Namibia, South Africa, or Zimbabwe	encounter		all possible combinations
Cheetah, Jagluiperd, Gepard, or Acinonyx jubatus	Botswana, Namibia, South Africa, or Zimbabwe	feeding		all possible combinations
Cheetah, Jagluiperd, Gepard, or Acinonyx jubatus	Botswana, Namibia, South Africa, or Zimbabwe	hunt(ed)		all possible combinations
Cheetah, Jagluiperd, Gepard, or Acinonyx jubatus	Botswana, Namibia, South Africa, or Zimbabwe	kill		all possible combinations
Cheetah, Jagluiperd, Gepard, or Acinonyx jubatus	Botswana, Namibia, South Africa, or Zimbabwe	mortality		all possible combinations
Cheetah, Jagluiperd, Gepard, or Acinonyx jubatus	Botswana, Namibia, South Africa, or Zimbabwe	observation		all possible combinations
Cheetah, Jagluiperd, Gepard, or Acinonyx jubatus	Botswana, Namibia, South Africa, or Zimbabwe	photo		all possible combinations
Cheetah, Jagluiperd, Gepard, or Acinonyx jubatus	Botswana, Namibia, South Africa, or Zimbabwe	prey		all possible combinations
Cheetah, Jagluiperd, Gepard, or Acinonyx jubatus	Botswana, Namibia, South Africa, or Zimbabwe	road accident		all possible combinations
Cheetah, Jagluiperd, Gepard, or Acinonyx jubatus	Botswana, Namibia, South Africa, or Zimbabwe	running		all possible combinations
Cheetah, Jagluiperd, Gepard, or Acinonyx jubatus	Botswana, Namibia, South Africa, or Zimbabwe	(on) safari		all possible combinations
Cheetah, Jagluiperd, Gepard, or Acinonyx jubatus	Botswana, Namibia, South Africa, or Zimbabwe	seen		all possible combinations
Cheetah, Jagluiperd, Gepard, or Acinonyx jubatus	Botswana, Namibia, South Africa, or Zimbabwe	shot		all possible combinations
Cheetah, Jagluiperd, Gepard, or Acinonyx jubatus	Botswana, Namibia, South Africa, or Zimbabwe	sighting		all possible combinations
Cheetah, Jagluiperd, Gepard, or Acinonyx jubatus	Botswana, Namibia, South Africa, or Zimbabwe	spotted		all possible combinations
Cheetah, Jagluiperd, Gepard, or Acinonyx jubatus	Botswana, Namibia, South Africa, or Zimbabwe	stalk(ing)		all possible combinations
Cheetah, Jagluiperd, Gepard, or Acinonyx jubatus	Botswana, Namibia, South Africa, or Zimbabwe	trophy		all possible combinations
Cheetah, Jagluiperd, Gepard, or Acinonyx jubatus	Botswana, Namibia, South Africa, or Zimbabwe	vehicle collision		all possible combinations
Cheetah, Jagluiperd, Gepard, or Acinonyx jubatus	Botswana, Namibia, South Africa, or Zimbabwe	video		all possible combinations
Cheetah, Jagluiperd, Gepard, or Acinonyx jubatus	Botswana, Namibia, South Africa, or Zimbabwe	wildlife camera		all possible combinations
Cheetah, Jagluiperd, Gepard, or Acinonyx jubatus	Botswana, Namibia, South Africa, or Zimbabwe	wildlife camera	farm or hunting farm	all possible combinations

## Sheet: Image_video repositories
No.	Name	Type	permanent URL	Notes
1	Google images	Image	https://images.google.com/	results mainly from cross-linked websites - search results are ordered differently by investigator
2	Youtube	Video	www.youtube.com	videos often required additional verification from personal websites, travel blogs etc
3	Panoramio/Google Earth	Image	http://www.panoramio.com/	sightings cross-linked with Google Earth entries
4	World of Animals	Video	http://www.worldofanimals.de/webcam_diverse.htm	Afrika WebCams section
5	MangoLinkCam	Video	http://www.mangolinkcam.com/webcams/mammals/african-wildlife.html
6	YourShot	Image	http://yourshot.nationalgeographic.com/	No response
7	Arkive	Image	http://www.arkive.org/	No response
8	Fotosearch	Image	http://www.fotosearch.de
9	FotoCommunity	Image	http://www.fotocommunity.de
10	Latest Sightings-Kruger	Image	https://www.facebook.com/latestsightingskruger/?fref=ts	specific to Kruger NP in South Africa
11	Africam Safari Cameras	Video	http://www.africam.com/wildlife/
12	Wild Earth- Videomarks	Video	http://www.wildearth.tv/videomarks
13	Flickr	Image	https://www.flickr.com/photos/tags/flicker/	not reliable as a stand-alone source as not providing reliable location, dates, or sufficient proof of photographed cheetahs being free-ranging animals
14	Instagram	Image	https://www.instagram.com/	not reliable as a stand-alone source as not providing reliable location, dates, or sufficient proof of photographed cheetahs being free-ranging animals
15	Pinterest	Image	https://de.pinterest.com/	not reliable as a stand-alone source as not providing reliable location, dates, or sufficient proof of photographed cheetahs being free-ranging animals

## Sheet: National newspapers
Country	Name	permanent URL	Language
Botswana	The Guardian	http://www.botswanaguardian.co.bw/	English
Botswana	The Daily News	http://www.dailynews.gov.bw/	English
Botswana	The Gazette	http://www.thegazette.news/	English
Botswana	The Ngami Times	http://www.ngamitimes.com/index.html	English
Botswana	The Voice	https://www.thevoicebw.com/	English
Botswana	The Sunday Standard	http://www.sundaystandard.info/	English
Botswana	Mmegi	http://www.mmegi.bw/	English
Namibia	Republikein	http://www.republikein.com.na/	Afrikaans
Namibia	Allgemeine Zeitung	http://www.allgemeine-zeitung.de/index.htm	German
Namibia	The Namibian	http://www.namibian.com.na/	English
Namibia	New Era	http://www.newera.com.na/	English
South Africa	The Star	http://www.iol.co.za/the-star	English
South Africa	The Citizen	http://www.citizen.co.za/	English
South Africa	Sunday Times	http://www.timeslive.co.za/sundaytimes/	English
South Africa	Mail Guardian	http://mg.co.za/	English
South Africa	The Times	http://www.timeslive.co.za/	English
South Africa	Daily Sun	http://www.dailysun.co.za/	English
South Africa	Die Burger		Afrikaans
South Africa	Beeld		Afrikaans
South Africa	Rapport		Afrikaans
South Africa	Son		Afrikaans
South Africa	Volksblad		Afrikaans
South Africa	Netwerk24	http://www.netwerk24.com/	Afrikaans
South Africa	SAPA		Afrikaans
Zimbabwe	Zimbabwe Situation	http://www.zimbabwesituation.com/	English
Zimbabwe	The Herald	http://www.herald.co.zw/	English
Zimbabwe	The Daily News	https://www.dailynews.co.zw/	English
Zimbabwe	Chronicle	www.chronicle.co.zw	English
Zimbabwe	NewsDay	https://www.newsday.co.zw/	English
Zimbabwe	The Standard	http://www.thestandard.co.zw/	English

## Sheet: Wildlife data repositories
No.	Name	permanent URL	Notes
1	iNaturalist	http://www.inaturalist.org/	results obtained from Cheetah & Wild Dog Sightings Project
2	Virtual Museum Mammal Map (South Africa)	http://vmus.adu.org.za/
3	EIS - Environmental Information Service Namibia	http://www.the-eis.com/
4	Carnivore Tracker App	https://play.google.com/store/apps/details?id=com.CCF.CarnivoreTracker&hl=en	no response

## Sheet: Social media sites
No.	Name	permanent URL	Notes
1	Facebook	https://www.facebook.com/	results mainly from cross-linked websites - requires login
2	Twitter	https://twitter.com/	results mainly from cross-linked websites - requires login

## Sheet: Private reserves
Search Sequence
1. Google search with: "private reserve" + district name (Botswana, Namibia) or province name (South Africa)
2. Collate country-specific list of privately owned estates
3. Check website and Facebook account for cheetah advertisement - logged if verifiable
4. Google search with: "name of reserve" + "review"
5. TripAdvisor (URL: http://www.tripadvisor.com/) reviews searched for "cheetah" - logged if verifiable
6. If TripAdvisor review not available other reviews sites searched for "cheetah" - logged if verifiable
