# Supplementary material for: The distribution and numbers of cheetah (Acinonyx jubatus) in southern Africa
Source: PeerJ. 2017 Dec 11;5:e4096. doi: 10.7717/peerj.4096 (PMC5729830; doi:10.7717/peerj.4096)
Supplement: Appendix 2 [file peerj-05-4096-s005.xls]

## Sheet: Acinonyx jubatus
Count	Type handling	Sex	Age minimum estimate	Age maximum estimate	Age class	Age at handling (y)	Age at death (y)	Source
1	immobilisation	male	4.5	5	7	4.75	5.51849	IZW
2	immobilisation	male	4	4.5	7	4.25	5.01849	IZW
3	immobilisation	male	3.5	4	7	3.75	4.51849	IZW
4	immobilisation	male	4	5	7	4.5	4.98356	IZW
5	immobilisation	male	8	9	8	8.5	8.94521	IZW
6	necropsy	male	2	3	6	2.5	2.5	IZW
7	immobilisation	male	3	3	6	3	3.77808	IZW
8	immobilisation	male	3	3	6	3	3.77808	IZW
9	immobilisation	male	3	3	6	3	3.77808	IZW
10	immobilisation	female	5	6	7	5.5	6.66438	IZW
11	immobilisation	male	4.5	5	7	4.75	5.63493	IZW
12	immobilisation	male	5	5	7	5	5.50959	IZW
13	necropsy	female	3	2	6	2.5	2.5	IZW
14	necropsy	male	4	4	7	4	4	IZW
15	immobilisation	male	2.5	3	6	2.75	5.91986	IZW
16	necropsy	male	12	12	8	12	12	IZW
17	immobilisation	male	7	7	7	7	8.3589	IZW
18	immobilisation	male	2.5	3	6	2.75	3.47603	IZW
19	immobilisation	male	5	5	7	5	5.30959	IZW
20	immobilisation	male	4	4	7	4	4.43699	IZW
21	immobilisation	male	4	4	7	4	8.96986	IZW
22	immobilisation	male	4	4	7	4	5.27671	IZW
23	immobilisation	male	4	4	7	4	6.26575	IZW
24	immobilisation	male	4	4	7	4	4.74795	IZW
25	immobilisation	male	3	3.5	6	3.25	4.39247	IZW
26	immobilisation	male	2.5	3	6	2.75	3.35274	IZW
27	immobilisation	male	2.5	3	6	2.75	3.88973	IZW
28	immobilisation	male	3	3.5	6	3.25	3.46918	IZW
29	immobilisation	male	2	2.5	6	2.25	3.11027	IZW
30	immobilisation	female	3	3	6	3	3.67945	IZW
31	necropsy	male	3	3	6	3	3	IZW
32	immobilisation	male	5	5	7	5	5.31781	IZW
33	immobilisation	male	5	5	7	5	5.31781	IZW
34	immobilisation	male	2.5	2.5	6	2.5	2.51096	IZW
35	necropsy	female	2.5	3	6	2.75	2.75	IZW
36	immobilisation	male	4.5	4.5	7	4.5	5.73562	IZW
37	immobilisation	male	3.5	3.5	7	3.5	6.56849	IZW
38	immobilisation	female	3.33	3.33	6	3.33	4.16836	IZW
39	immobilisation	male	3	3	6	3	6.41096	IZW
40	necropsy	female	8	8	8	8	8	IZW
41	necropsy	female	3	4	6	3.5	3.5	IZW
42	necropsy	male	3	4	6	3.5	3.5	IZW
43	necropsy	male	2	3	6	2.5	2.5	IZW
44	necropsy	female	9	10	8	9.5	9.5	IZW
45	necropsy	female	3	3	6	3	3	IZW
46	immobilisation	female	2.5	2.5	6	2.5	3.93562	IZW
47	immobilisation	male	2	2	6	2	3.87945	IZW
48	immobilisation	male	3.5	3.5	7	3.5	4.13014	IZW
49	immobilisation	female	2	2	6	2	2.84384	IZW
50	immobilisation	male	3	3	6	3	3.35068	IZW
51	immobilisation	male	8	9	8	8.5	8.74658	IZW
52	immobilisation	male	3	4	6	3.5	5.2726	IZW
53	immobilisation	female	4	5	7	4.5	4.9274	IZW
54	necropsy	female	3	3.5	6	3.25	3.25	IZW
55	necropsy	male	5	5	7	5	5	IZW
56	immobilisation	male	2.5	3	6	2.75	3.67603	IZW
57	immobilisation	male	2	3	6	2.5	2.71644	IZW
58	immobilisation	male	2	3	6	2.5	2.78767	IZW
59	immobilisation	male	2.5	2.5	6	2.5	2.77397	IZW
60	immobilisation	male	3	3.5	6	3.25	4.25	IZW
61	immobilisation	male	2.5	3	6	2.75	4.45411	IZW
62	immobilisation	male	3	4	6	3.5	3.68904	IZW
63	necropsy	female	6	7	7	6.5	6.5	IZW
64	immobilisation	male	2.5	2.5	6	2.5	6.43973	IZW
65	immobilisation	male	2	3	6	2.5	2.77123	IZW
66	immobilisation	male	3	3.5	6	3.25	3.4226	IZW
67	immobilisation	male	3	3.5	6	3.25	4.0911	IZW
68	immobilisation	male	3.5	4	7	3.75	5.27466	IZW
69	immobilisation	female	4	4	7	4	6.18082	IZW
70	immobilisation	male	8	8	8	8	8.53425	IZW
71	immobilisation	male	3.5	4	7	3.75	5.02397	IZW
72	immobilisation	male	3	3.5	6	3.25	5.36096	IZW
73	immobilisation	male	3	3	6	3	4.58356	IZW
74	immobilisation	male	3.5	3.5	7	3.5	4.26986	IZW
75	immobilisation	male	3.5	3.5	7	3.5	4.46301	IZW
76	immobilisation	female	4	5	7	4.5	7.67671	IZW
77	immobilisation	male	4	4	7	4	6.79726	IZW
78	necropsy	female	2	2	6	2	2	IZW
79	immobilisation	male	3	3	6	3	3.00274	IZW
80	immobilisation	male	5	5	7	5	5.86575	IZW
81	immobilisation	male	3	3	6	3	3.95753	IZW
82	immobilisation	female	5	6	7	5.5	5.75753	IZW
83	immobilisation	male	2.8863	2.8863	6	2.8863	5.86438	IZW
84	immobilisation	male	2.8863	2.8863	6	2.8863	5.13973	IZW
85	immobilisation	male	5	5	7	5	5.78082	IZW
86	necropsy	female	3	3	6	3	3	IZW
87	immobilisation	male	3	3	6	3	4.06301	IZW
88	immobilisation	male	4	4	7	4	4.16712	IZW
89	immobilisation	male	3	3.5	6	3.25	3.38425	IZW
90	immobilisation	male	4.5	4.5	7	4.5	4.36575	IZW
91	immobilisation	male	5.5	5.5	7	5.5	5.86575	IZW
92	immobilisation	male	3	3	6	3	3.67397	IZW
93	immobilisation	male	2.5	3	6	2.75	4.47877	IZW
94	immobilisation	male	2.5	3	6	2.75	6.62945	IZW
95	necropsy	female	4	4	7	4	4	IZW
96	immobilisation	male	3	3	6	3	5.4411	IZW
97	necropsy	male	4	5	7	4.5	4.5	IZW
98	necropsy	male	2.5	3.5	6	3	3	IZW
99	immobilisation	male	2	2	6	2	2.37123	IZW
100	immobilisation	male	2	2	6	2	3.76986	IZW
101	immobilisation	female	2	2.5	6	2.25	3.37055	IZW
102	immobilisation	male	2	3	6	2.5	2.68082	IZW
103	immobilisation	male	3	4	6	3.5	5.6589	IZW
104	immobilisation	male	3	4	6	3.5	5.6589	IZW
105	immobilisation	male	2	2.5	6	2.25	4.08836	IZW
106	necropsy	female	3	4	6	3.5	3.5	IZW
107	immobilisation	male	2	2	6	2	2.47397	IZW
108	immobilisation	male	2	2	6	2	2.23562	IZW
109	immobilisation	male	4.5	4.5	7	4.5	6.52192	IZW
110	immobilisation	male	3.5	3.5	7	3.5	3.53014	IZW
111	immobilisation	male	4	4	7	4	4.68493	IZW
112	necropsy	male	2	2	6	2	2	IZW
113	necropsy	female	2	2	6	2	2	IZW
114	immobilisation	male	3	3.5	6	3.25	3.81712	IZW
115	necropsy	male	3	4	6	3.5	3.5	IZW
116	necropsy	male	3	4	6	3.5	3.5	IZW
117	immobilisation	male	4	4	7	4	4.7863	IZW
118	immobilisation	male	3	3	6	3	3.17671	IZW
119	necropsy	female	2	2	6	2	2	IZW
120	necropsy	female	4	4	7	4	4	IZW
121	immobilisation	female	6	8	7	7	10.7726	IZW
122	immobilisation	male	3.5	4	7	3.75	4.57192	IZW
123	immobilisation	male	#REF!	#REF!	7	3.75	4.5911	IZW
124	immobilisation	female	2.5	3	6	2.75	2.75	IZW
125	immobilisation	male	3	3.5	6	3.25	4.15411	IZW
126	immobilisation	male	4.43822	4.60822	7	4.52322	4.6739	IZW
127	immobilisation	male	2.5	3	6	2.75	2.88425	IZW
128	necropsy	female	3	3	6	3	3	IZW
129	immobilisation	male	3	3	7	3	8.38904	IZW
130	immobilisation	male	2.5	2.5	6	2.5	6.54384	IZW
131	immobilisation	male	3.5	3.5	7	3.5	5.69726	IZW
132	immobilisation	female	2.5	3	6	2.75	4.19	FJW
133	immobilisation	male	2.5	3	6	2.75	3.64	FJW
134	immobilisation	male	3	3.5	7	3.25	6.56	FJW
135	immobilisation	male	2	2.5	6	2.25	2.32	FJW
136	immobilisation	male	4	5	7	4.5	5.28	FJW
137	immobilisation	male	3	4	7	3.5	6.38	FJW
138	immobilisation	female	2.5	3.5	6	3	5.36	FJW
139	necropsy	male	2.5	3	6	2.75	2.75	FJW
140	necropsy	male	2.5	3	6	2.75	2.75	FJW
141	necropsy	male	2.5	3	6	2.75	2.75	FJW
142	necropsy	female	2	2	6	2	2	FJW
143	necropsy	female	4	5	7	4.5	4.5	FJW
144	immobilisation	male	5	6	7	5.5	6.99	FJW
145	immobilisation	male	6	7	7	6.5	7.83	FJW
146	immobilisation	male	3	4	6	3.5	3.58	FJW
147	immobilisation	male	4	4.5	6	4.25	5.01	FJW
148	immobilisation	male	5	6	7	5.5	5.74	FJW
149	necropsy	male	4	4.5	6	4.25	4.25	FJW
150	immobilisation	male	3.5	4	6	3.75	5.34	FJW
151	necropsy	male	2	2	6	2	2	FJW
152	necropsy	male	8	9	8	8.5	8.5	FJW
153	necropsy	male	4	5	7	4.5	4.5	FJW
154	necropsy	female	3	3.5	6	3.25	3.25	FJW
155	necropsy	male	8	11	8	9.5	9.5	FJW
156	necropsy	female	8	10	8	9	9	FJW
157	necropsy	male	3	4	6	3.5	3.5	FJW
158	necropsy	male	5	6	7	5.5	5.5	FJW
159	necropsy	male	2	2.5	6	2.25	2.25	FJW
160	necropsy	female	2	2.5	6	2.25	2.25	FJW
161	necropsy	male	2	2	6	2	2	FJW
	Mean					3.77252	4.64222
	SD					1.5724	1.8379
