# Supplementary material for: The distribution and numbers of cheetah (Acinonyx jubatus) in southern Africa
Source: PeerJ. 2017 Dec 11;5:e4096. doi: 10.7717/peerj.4096 (PMC5729830; doi:10.7717/peerj.4096)
Supplement: Appendix 4 [file peerj-05-4096-s007.xlsx]

## Sheet: Sheet1
	No. Pixel by Class (livestock Per sq. km)										Percent										Cumulative percent
Livestock Type	0	<1	<5	<10	<20	<50	<100	100+	sum		0	0-1	1-5	5-10	10-20	20-50	50-100	100+	sum		0	<1	<5	<10	<20	<50	<100	100+
Cattle Cheetah Freerange Presence	1007	2251	3105	1622	785	208	7	5	8990	Cattle Cheetah Freerange Presence	0.112013	0.250389	0.345384	0.180423	0.0873192	0.0231368	0.000778643	0.000556174	1		0.112013	0.362403	0.707786	0.888209	0.975528	0.998665	0.999444	1
Cattle Background	1523	9604	5541	4306	5731	3271	107	32	30115	Cattle Background	0.0505728	0.318911	0.183995	0.142985	0.190304	0.108617	0.00355305	0.00106259	1		0.0505728	0.369484	0.553478	0.696464	0.886767	0.995384	0.998937	1
Sheep Cheetah Freerange Presence	1006	4920	2589	328	22	83	22	20	8990	Sheep Cheetah Freerange Presence	0.111902	0.547275	0.287987	0.036485	0.00244716	0.00923248	0.00244716	0.00222469	1		0.111902	0.659177	0.947164	0.983648	0.986096	0.995328	0.997775	1
Sheep Background	1516	12185	7674	3252	2007	2795	535	151	30115	Sheep Background	0.0503404	0.404616	0.254823	0.107986	0.0666445	0.0928109	0.0177652	0.00501411	1		0.0503404	0.454956	0.709779	0.817765	0.88441	0.977221	0.994986	1
Goat Cheetah Freerange Presence	1016	2371	4392	733	416	44	4	14	8990	Goat Cheetah Freerange Presence	0.113014	0.263737	0.488543	0.081535	0.0462736	0.00489433	0.000444939	0.00155729	1		0.113014	0.376752	0.865295	0.94683	0.993103	0.997998	0.998443	1
Goat Background	1672	11091	11567	3878	1400	377	71	59	30115	Goat Background	0.0555205	0.368288	0.384094	0.128773	0.0464885	0.0125187	0.00235763	0.00195916	1		0.0555205	0.423809	0.807903	0.936676	0.983165	0.995683	0.998041	1
	Pixel Values by Class (human pop. Per sq. km)
	0	<25	<50	50+							0	0-25	25-50	50+							0	<25	<50	50+
Human Population Density Cheetah Freerange Presence	6166	2609	98	108					8981		0.686561	0.290502	0.0109119	0.0120254							0.686561	0.977063	0.987975	1
Human Population Density Background	15614	11918	1301	1267					30100		0.518738	0.395947	0.0432226	0.042093							0.518738	0.914684	0.957907	1
	516	7353	2436	2684	4946	3063	100	27
	510	7265	5085	2924	1985	2712	513	131
	656	8720	7175	3145	984	333	67	45
