# Supplementary material for: The distribution and numbers of cheetah (Acinonyx jubatus) in southern Africa
Source: PeerJ. 2017 Dec 11;5:e4096. doi: 10.7717/peerj.4096 (PMC5729830; doi:10.7717/peerj.4096)
Supplement: Appendix 6 [file peerj-05-4096-s009.xls]

## Sheet: Persecution summary
	Cheetah persecution summary
		Assessment	Total sample
		Reported cheetah presence
	Sampled properties	150 (81.1%)	185
	Sampled area (km2)	15,223.1 (79.4%)	19184.2
		Cheetahs actively persecuted
	Percent of sampled properties	49 (26.5%)
	Percent of sampled area (km2)	4,420.1 (23.0%)
		Cheetahs perceived as conflict
	Percent of sampled properties	92 (49.7%)
	Percent of sampled area (km2)	8,899.4 (46.4%)
		Entire study (2010-2015)
	Total no. trapped confirmed	245
	Total no. killed confirmed	196
	Total no. captivity/translocation confirmed	49

## Sheet: Persecution per 100km2
	Cheetah persecution by area
	Assessment	Measure	Value	Assumptions and Treatments
	Annual cheetah removal rate (kill+captivity combined) from free-ranging population per 100km2 for all properties 2010-2015	no. per 100km2/year	0.5942	these data include all age classes and both sexes
	Adult female annual removal rate per 100km2 for all properties 2010-2015	no. per 100km2/year	0.1016	adjusted to observed off-take sex and age ratios
	Adult male annual removal rate per 100km2 for all properties 2010-2015	no. per 100km2/year	0.1955	adjusted to observed off-take sex and age ratios
	Sub-adult female annual removal rate per 100km2 for all properties 2010-2015	no. per 100km2/year	0.1384	adjusted to observed off-take sex and age ratios
	Sub-adult male annual removal rate per 100km2 for all properties 2010-2015	no. per 100km2/year	0.1587	adjusted to observed off-take sex and age ratios

## Sheet: Persecution by land use
	Cheetah persecution by main income
	Primary land use strategy	Sample contribution area (km2) (% of total)	Sample contribution (properties) (% of total)	Contribution to cheetahs killed (% of total)	Contribution to annual effective removal from free-range (% of total)
	Livestock (cattle and/or sheep/goats)	10,830.20 (56.4%)	109 (58.9%)	132 (67.4%)	0.636
	Wildlife (game and/or hunt)	2,458.19 (12.8%)	25 (13.5%)	43 (21.9%)	0.25
	Recreation	3,955.86 (20.6%)	20 (10.8%)	0 (0%)	0.009
	Business	1,776.94 (09.3%)	27 (14.6%)	18 (9.2%)	0.092
	Other	162.99 (00.9%)	4 (2.2%)	3 (1.5%)	0.013
	Total	19184.2	185	196	114

## Sheet: Cheetah sex and age_persecution
	Persecution_Namibia_farms_2010-2015
	Sex	Male	Male	Female	Female	Total
	Age class	Sub-adult	Adult	Sub-adult	Adult
	No. of individuals	39	48	34	25	146
	Percent	26.7	32.9	23.3	17.1	100

## Sheet: Cheetah sinks_influence
	Effective cheetah removal from free-ranging population
	Removal Cheetah Farms Namibia 2010-2015	No. of properties	Contribution to total effective removal
			(including kill + permanent captivity)
	No. of cheetahs removed over 24 months	43	228
	1 cheetah removed	15	15 (6.6%)
	2 cheetahs removed	5	10 (4.4%)
	3 cheetahs removed	13	39 (17.1%)
	4 cheetahs removed	1	4 (1.7%)
	5 + cheetahs removed	9	160 (70.2%)
	1 + cheetahs removed	43	1
	2 + cheetahs removed	28	0.9342
	3 + cheetahs removed	23	0.8904
	4 + cheetahs removed	10	0.7193
	5 + cheetahs removed	9	0.7018
	6 + cheetahs removed	8	0.6798
	7 + cheetahs removed	7	0.6535
	8 + cheetahs removed	7	0.6535
	9 + cheetahs removed	4	0.5482
	10 + cheetahs removed	4	0.5482
	11 + cheetahs removed	4	0.5482
	12 + cheetahs removed	3	0.5
	13 + cheetahs removed	3	0.5
	14 + cheetahs removed	3	0.5
	15 + cheetahs removed	3	0.5
	16 + cheetahs removed	2	0.4342
	17 + cheetahs removed	2	0.4342
	20 + cheetahs removed	1	0.3596
