# Supplementary material for: The distribution and numbers of cheetah (Acinonyx jubatus) in southern Africa
Source: PeerJ. 2017 Dec 11;5:e4096. doi: 10.7717/peerj.4096 (PMC5729830; doi:10.7717/peerj.4096)
Supplement: Appendix 8 [file peerj-05-4096-s011.xls]

## Sheet: Cheetah Metapopulation
Cluster	Reserve	Biome	Inside current free roamer range (Yes = 1, No = 0)	Size (km2)	Tenure	Reasons for reintroduction	Cheetah both sexes	Male (single)	Males (coalition)	Female	Subadult (male)	Subadult (female)	Subadult (?)	Cubs	?	Total population April 2016	Density per 100 km2
Waterberg (15)	Mokolo and Ka’ingo PGRs	Savannah	1	157	Private	Ecological	0	1								1	0.6369
	Entabeni PGR	Savannah	0	63.5	Private	Ecotourism	0		2							2	3.1496
	Shambala PGR	Savannah	1	100	Private	Ecotourism	0	1								1	1
	Welgevonden PGR	Savannah	1	336.5	Private	Ecotourism	1	1	2	4				1		8	2.3774
	Witwater PGR	Savannah	1	65	Private	Ecotourism	0		2		2					4	6.1538
	Thaba Tholo Game Farm	Savannah	1	300	Private	Free roamers always present	1							4	12	16	5.3333
	Mabula PGR	Savannah	0	120	Private	Ecotourism	1		1	1				2		4	3.3333
	Marakele NP & Pty	Savannah	1	900	State	Free roamers always present	0		1							1	0.1111
	Pilansberg NP	Savannah	0	572	State	Ecotourism	1		2	1				3		6	1.049
	Madikwe Nature Reserve	Savannah	1	750	State	Ecotourism	0	1	4							5	0.6667
	Dinokeng Game Reserve	Savannah	0	185	Private/State	Ecotourism	1		2	1						3	1.6216
	Rietvlei Nature Reserve	Grassland	0	36	State	Ecological	1	1			1	3				5	13.8889
	Meletse PGR	Savannah	0	130	Private	Ecological	1	1		1				3		5	3.8462
	Madikwe Conservancy	Savannah	1	89	Private	Conservation/Private Leisure	1	2		1						3	3.3708
				3804				8	16	9	3	3	0	13	12	64
Lowveld (9)	Blue Canyon Conservancy	Savannah	1	160	Private	Ecotourism	1		2	2					5	9	5.625
	Kapama PGR	Savannah	1	170	Private	Free roamers always present	1	1		2						3	1.7647
	Karongwe PGR	Savannah	1	80	Private	Ecotourism	1	1		1				2		4	5
	Louis Trichart AFB	Savannah	0	26	State	Promote flight safety	0	1	2							3	11.5385
	Makutsi PGR	Savannah	1	19	Private	Ecotourism	1	1		1						2	10.5263
	Nkomazi PGR	Grasslands	0	120	Private	Ecotourism	0	1	2							3	2.5
	Pidwa Wilderness and Makalali PGR	Savannah	1	250	Private	Free roamers always present but more for ecological reasons	1		5	2						7	2.8
	SanWild Wildlife Sanctuary	Savannah	1	60	Private	Rewilding	1		2	2						4	6.6667
	Selati	Savannah	1	270	Private	Ecotourism	0	2								2	0.7407
				1155				7	13	10	0	0	0	2	5	37
KwaZulu-Natal (10)	AmaKhosi PGR	Savannah	0	125	Private	Ecotourism	0		2							2	1.6
	Mkuze Falls PGR	Savannah	0	125	Private	Ecotourism	1		2	1				2		5	4
	Zimanga PGR	Savannah	0	78.57	Private	Ecological	1	2		1						3	3.8183
	uMhkuze Game Reserve	Savannah	0	400	State	Ecological & Ecotourism	1	1	2	3				8		14	3.5
	Nambiti PGR	Savannah	0	100	Private	Ecotourism	0	1								1	1
	Phinda PGR	Savannah	0	235	Private	Ecotourism	1		4	5	4	7		12		32	13.617
	Thanda PGR	Savannah	0	155	Private	Ecotourism	1	1	2	1						4	2.5806
	Zulu Nyala PGR	Savannah	0	20	Private	Ecotourism	0	1								1	5
	Zululand Rhino PGR	Savannah	0	220	Private	Ecological & Ecotourism	1	4		5	2	2			1	14	6.3636
	Hluhluwe-Imfolozi Game Reserve	Savannah	0	960	State	Ecological & Ecotourism	1		2	7				7		16	1.6667
				2418.57				10	14	23	6	9	0	29	1	92
Eastern Cape (13)	Amakhala PGR	Thicket	0	57	Private	Ecotourism	1	1		1	3	1				6	10.5263
	Gondwana PGR	Fynbos	0	102.52	Private	Ecotourism	0		1							1	0.9754
	Hopewell PGR	Thicket	0	55	Private	Ecotourism	1	1		1	1					3	5.4545
	Kwandwe PGR	Thicket	0	176	Private	Ecotourism	1	2	2	2			1		4	11	6.25
	Mount Camdeboo PGR	Nama Karoo	0	45	Private	Ecotourism	1	1		1				3		5	11.1111
	Samara PGR	Nama Karoo	0	120	Private	Ecotourism	1	2		2					3	7	5.8333
	Sanbona PGR	Succulent Karoo	0	540	Private	Ecotourism	1		2	2				3		7	1.2963
	Shamwari PGR	Thicket	0	47	Private	Ecotourism	1		2	1				3		6	12.766
	Lalibela PGR	Thicket	0	75	Private	Ecotourism	1	1		1						2	2.6667
	Phumba PGR	Thicket	0	20	Private	Ecotourism	0		3							3	15
	Mountain Zebra NP	Grasslands	0	240	State	Ecological & Ecotourism	1			3	2	1		12		18	7.5
	Addo NP	Nama Karoo	0	160	State	Ecotourism	0		3							3	1.875
	Garden Route Game Lodge	Fynbos	0	20	Private	Ecotourism	1	1		1						2	10
				1657.52				9	13	15	6	2	1	21	7	74
Kalahari (4)	Glen Lyon PGR	Savannah	1	660	Private	Private leisure	0	3								3	0.4545
	Khamab PGR	Savannah	1	940	Private	Free roamers always present	1								30	30	3.1915
	Tswalu PGR	Savannah	1	1000	Private	Conservation	1	1	4	3			3	3	6	20	2
	Loahu Valley Reserve	Grassland	0	86	Private	Conservation	0		2							2	2.3256
				2686				4	6	3	0	0	3	3	36	55
			Total area	11730.5			TOTAL	38	62	60	15	14	4	68	61	322
